# Supplementary material
Source: publisher site journal article supplement (https://www.dovepress.com/article/499902)
Supplement: Supplementary file 1 [file get_supplementary_file.php]

Supplementary Table 1. Participants attitude towards artificial intelligence (AI) (n = 384).

| Item | Strongly disagree | Disagree | Neutral | Agree | Strongly agree |
| --- | --- | --- | --- | --- | --- |
|  |  |  |  |  |  |
| Health science students must learn AI basics | 43 (11.2) | 47 (12.2) | 125 (32.6) | 116 (30.2) | 53 (13.8) |
| AI will make a revolution in changing the health science education curriculum | 33 (8.6) | 51 (13.3) | 103 (26.8) | 133 (34.6) | 64 (16.7) |
| Human faculties will be replaced by AI in the future a | 89 (23.2) | 100 (26.0) | 121 (31.5) | 50 (13.0) | 24 (6.3) |
| AI in health science is essential for improving patient outcomes. | 37 (9.6) | 53 (13.8) | 124 (32.3) | 123 (32.0) | 47 (12.2) |
| AI should be a part of the regular training | 33 (8.6) | 62 (16.1) | 126 (32.8) | 115 (29.9) | 48 (12.5) |
| Widespread use of AI in healthcare may lead to job scarcity for health science students a | 47 (12.2) | 98 (25.5) | 109 (28.4) | 64 (16.7) | 66 (17.2) |
| I have concerns about the ethical implications of using AI in healthcare a | 48 (12.5) | 82 (21.4) | 110 (28.6) | 84 (21.9) | 60 (15.6) |
| Incorporating AI education into the health science curriculum is a positive step. | 41 (10.7) | 51 (13.3) | 125 (32.6) | 105 (27.3) | 62 (16.1) |
| I am open to embracing new AI-based tools and technologies in my future healthcare practice. | 44 (11.5) | 54 (14.1) | 108 (28.1) | 124 (32.3) | 54 (14.1) |
| AI should be used as a complementary, with human judgment remaining a critical factor | 38 (9.9) | 49 (12.8) | 93 (24.2) | 94 (24.5) | 110 (28.6) |

a Reverse scoring

Supplementary Table 2. Participants practice towards AI (n = 384).

| Item | Strongly disagree | Disagree | Neutral | Agree | Strongly agree |
| --- | --- | --- | --- | --- | --- |
|  |  |  |  |  |  |
| I am confident in my ability to use AI-based tools in my health science studies | 35 (9.1) | 58 (15.1) | 115 (29.9) | 110 (28.6) | 66 (17.2) |
| I frequently use AI to prepare my homework | 41 (10.7) | 71 (18.5) | 120 (31.3) | 98 (25.5) | 54 (14.1) |
| I regularly check AI for spelling and grammar. | 52 (13.5) | 70 (18.2) | 110 (28.6) | 101 (26.3) | 51 (13.3) |
| I actively engage in updating AI technologies relevant to health sciences. | 52 (13.5) | 95 (24.7) | 124 (32.3) | 78 (20.3) | 35 (9.1) |
| I am comfortable collaborating with AI systems as part of a healthcare team | 41 (10.7) | 51 (13.3) | 128 (33.3) | 121 (31.5) | 43 (11.2) |
| I frequently use AI for personality development and other skills | 43 (11.2) | 71 (18.5) | 117 (30.5) | 103 (26.8) | 50 (13.0) |
| I regularly use AI for idea generation related to health science field. | 46 (12.0) | 81 (21.1) | 118 (30.7) | 91 (23.7) | 48 (12.5) |
